# Supplementary material
Source: Springer Nature journal article supplement (https://www.springermedizin.de/resource/supplementary/13034_2008_64_MOESM2_ESM.pdf/9652320)
Supplement: MOESM2 [file 9652320]

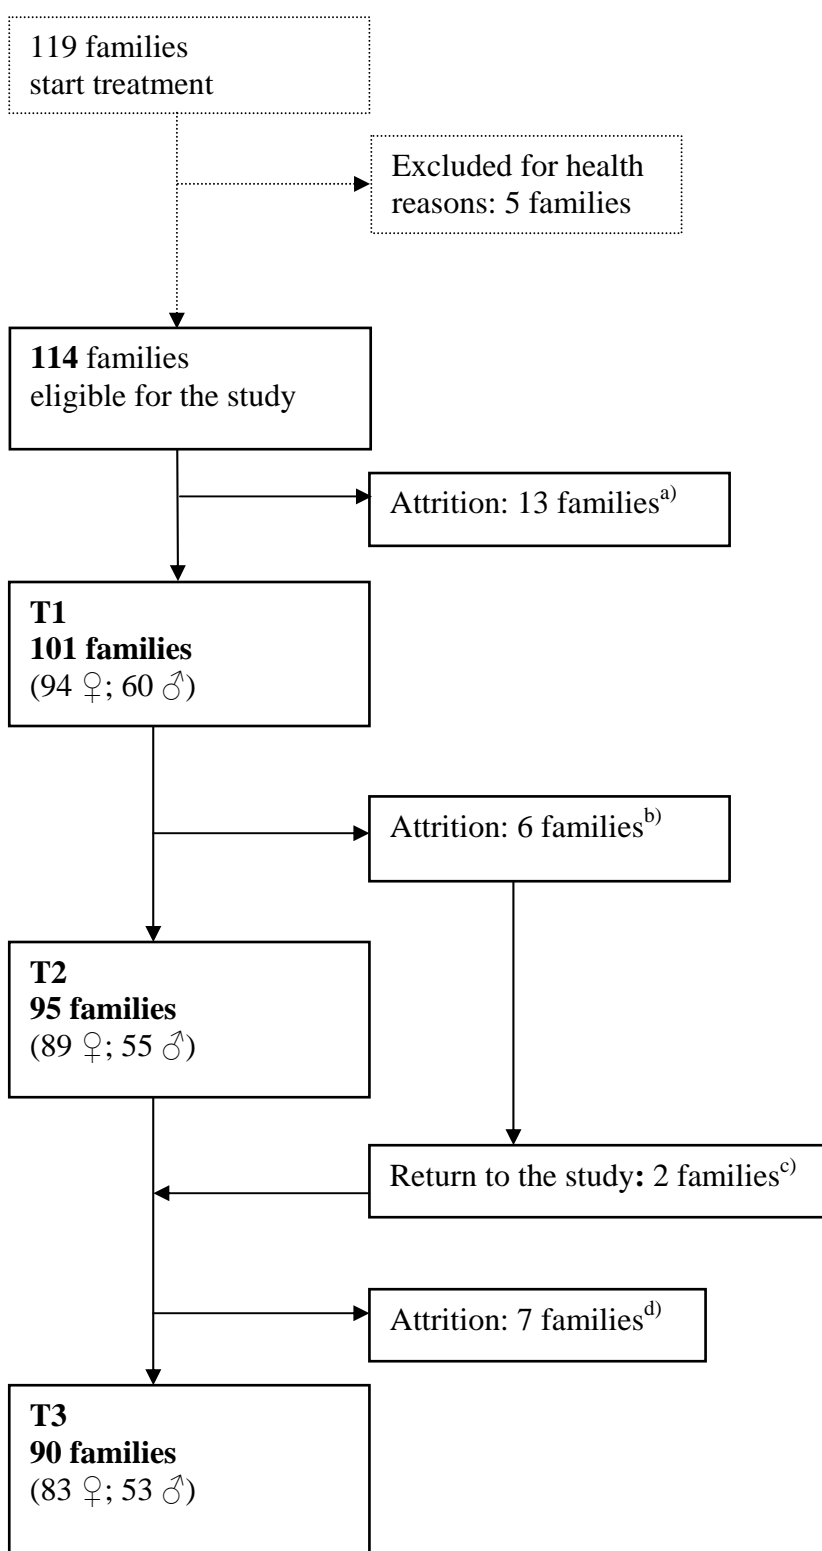

**a) 10 parent related;** too burdened (5), hesitant about their own ability to answer (3), wished to protect private life (1), had not time (1) & **3 staff related;** oblivion (1) uncertainty about the families' intention (2)

**b) answered too late (2), declined (2), expelled from the country (1), staff did not manage to establish contact (1)**

**c) 2 families not present at T2 (answered too late (1) staff did not manage to establish contact (1)) returned to the study at T3**

**d) declined (1), hidden because of threat of expulsion (1), ill-health (1), left the country (1), staff did not manage to establish contact (1), information of cause missing (2)**
